# Supplementary material for: Measurements of American lobster heart rate and movements in the wild using a low-cost open source datalogger
Source: Research Square preprint supplement (doi:10.21203/rs.3.rs-1257827/v1), 2022-02-01

**Supplementary information for Gutzler and Watson, “Measurements of American lobster heart rate and movements in the wild using a low-cost open source datalogger”**

**Online Resource 1.** Time-lapse video of a C-HAT equipped lobster in the laboratory, showing data collected by the C-HAT. Note the correspondence between lobster activity and acceleration. Light and heart IR sensors report analog voltages, while the accelerometer and temperature sensors report calibrated values. MI and HR are calculated in LabChart following download of the data after each deployment.

**Online Resource 2.** Time-lapse video of a C-HAT equipped lobster in the laboratory, showing a startle response and movement in response to the lab lights being turned on. When the lights turn on, the light sensor voltage increases and bradycardia is evident in the heart trace, then the lobster moves in response.

**Online Resource 3.** Results of linear regressions comparing four acceleration-based indices of activity against the distance lobsters moved, as reported by the VPS array.

| **Index** | **Estimate** | **SE** | **ANOVA** | **P** |
| --- | --- | --- | --- | --- |
| Xdiff (Jury et al. 2018) | -0.5697 | 0.395 | F(1,439)= 2.08 | 0.150 |
| Intercept | 3.453 | 0.373 |
| ODBA (Wilson et al. 2006) | 6.115 | 0.532 | F(1,508)= 132.1 | <0.001 |
| Intercept | 0.372 | 0.268 |
| VeDBA (Qasem et al. 2012) | 8.950 | 0.757 | F(1,508) = 139.9 | <0.001 |
| Intercept | 0.346 | 0.264 |
| MI | 12.013 | 1.059 | F(1,174)= 128.7 | <0.001 |
| Intercept | -6.969 | 1.090 |
| MI + HR | 12.733 | 1.516 | F(1,116)= 87.0 | <0.001 |
| Intercept | -7.590 | 1.365 |

**Online Resource 4.** Ten minute average HR (in bpm) as a function of time since each lobster was released, showing elevated rates after handling. Point colors represent different individuals (n = 5).


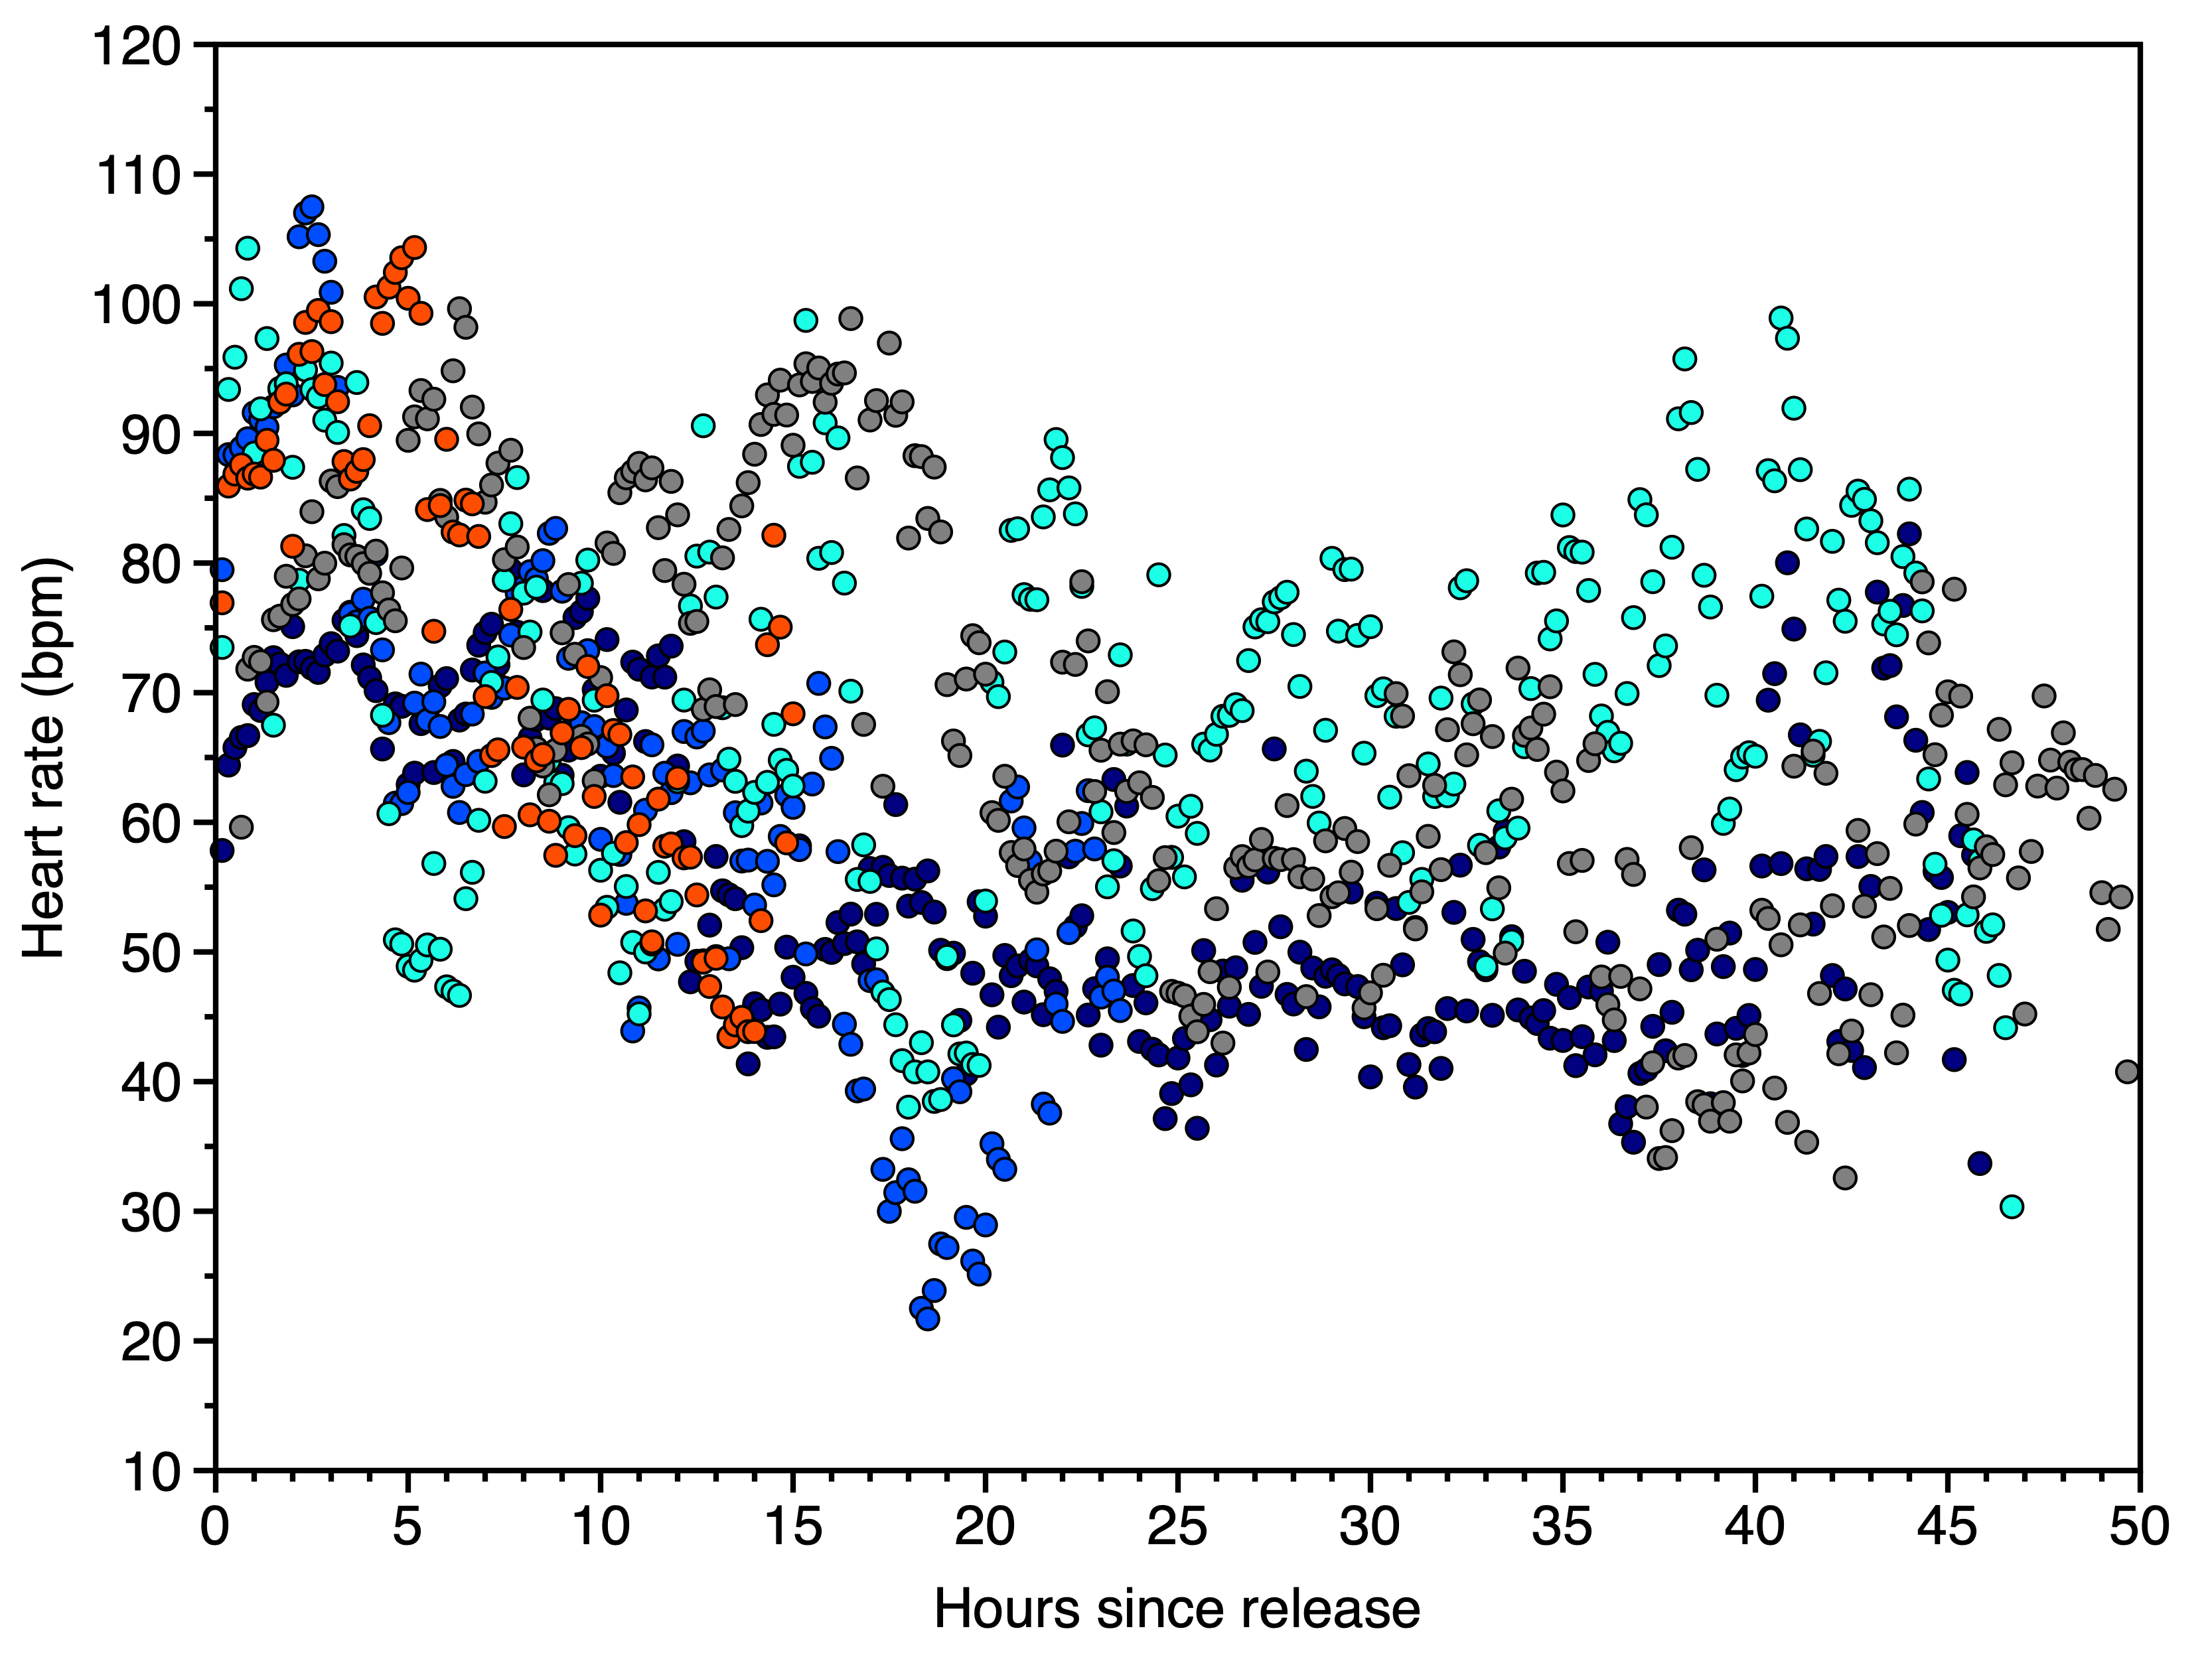

Supplement: Supplementary file 1 [file 6f8751feafe58a831494f2a1.docx]
